# Supplementary material
Source: publisher figshare collection journal article supplement (https://acs.figshare.com/ndownloader/files/4059997)

# checkCIF/PLATON report

You have not supplied any structure factors. As a result the full set of tests cannot be run.

No syntax errors found.      CIF dictionary      Interpreting this report

## Datablock: makino13

---

Bond precision:    C-C = 0.0189 A                      Wavelength=0.71073

Cell:                      a=12.914(4)                      b=13.120(4)                      c=39.995(13)  
                                    alpha=90                      beta=90                      gamma=90

Temperature:              120 K

|                | Calculated               | Reported               |
|----------------|--------------------------|------------------------|
| Volume         | 6776(4)                  | 6776(4)                |
| Space group    | I 21 21 21               | I 21 21 21             |
| Hall group     | I 2b 2c                  | ?                      |
| Moiety formula | C46 H42 N13 Ru2, 3(F6 P) | ?                      |
| Sum formula    | C46 H42 F18 N13 P3 Ru2   | C46 H42 F18 N13 P3 Ru2 |
| Mr             | 1413.98                  | 1413.98                |
| Dx,g cm-3      | 1.386                    | 1.386                  |
| Z              | 4                        | 4                      |
| Mu (mm-1)      | 0.605                    | 0.605                  |
| F000           | 2816.0                   | 2816.0                 |
| F000'          | 2808.79                  |                        |
| h,k,lmax       | 16,16,49                 | 16,16,49               |
| Nref           | 3834[ 6926]              | 6864                   |
| Tmin,Tmax      | 0.917,0.976              | 0.909,0.976            |
| Tmin'          | 0.908                    |                        |

Correction method= MULTI-SCAN

Data completeness= 1.79/0.99                      Theta(max)= 26.330

R(reflections)= 0.0988( 5222)                      wR2(reflections)= 0.2594( 6864)

S = 1.039                                      Npar= 372

---

The following ALERTS were generated. Each ALERT has the format

**test-name\_ALERT\_alert-type\_alert-level.**

Click on the hyperlinks for more details of the test.

---

### Alert level B

|                   |                            |    |    |    |    |           |
|-------------------|----------------------------|----|----|----|----|-----------|
| PLAT231_ALERT_4_B | Hirshfeld Test (Solvent)   | P3 | -- | F7 | .. | 11.8 su   |
| PLAT234_ALERT_4_B | Large Hirshfeld Difference | P2 | -- | F6 | .. | 0.26 Ang. |

---

## ● Alert level C

RFACR01\_ALERT\_3\_C The value of the weighted R factor is > 0.25

Weighted R factor given 0.259

|                   |                                                  |            |
|-------------------|--------------------------------------------------|------------|
| PLAT084_ALERT_2_C | High wR2 Value .....                             | 0.26       |
| PLAT214_ALERT_2_C | Atom F6 (Anion/Solvent) ADP max/min Ratio        | 4.2 prola  |
| PLAT230_ALERT_2_C | Hirshfeld Test Diff for N5 -- C23 ..             | 5.5 su     |
| PLAT230_ALERT_2_C | Hirshfeld Test Diff for C20 -- C21 ..            | 5.3 su     |
| PLAT234_ALERT_4_C | Large Hirshfeld Difference N2 -- C6 ..           | 0.20 Ang.  |
| PLAT234_ALERT_4_C | Large Hirshfeld Difference N3 -- C7 ..           | 0.17 Ang.  |
| PLAT234_ALERT_4_C | Large Hirshfeld Difference N4 -- C13 ..          | 0.16 Ang.  |
| PLAT234_ALERT_4_C | Large Hirshfeld Difference N6 -- N7 ..           | 0.17 Ang.  |
| PLAT234_ALERT_4_C | Large Hirshfeld Difference C1 -- C2 ..           | 0.18 Ang.  |
| PLAT234_ALERT_4_C | Large Hirshfeld Difference C2 -- C3 ..           | 0.20 Ang.  |
| PLAT234_ALERT_4_C | Large Hirshfeld Difference C12 -- C13 ..         | 0.22 Ang.  |
| PLAT234_ALERT_4_C | Large Hirshfeld Difference C15 -- C16 ..         | 0.20 Ang.  |
| PLAT234_ALERT_4_C | Large Hirshfeld Difference C21 -- C22 ..         | 0.19 Ang.  |
| PLAT234_ALERT_4_C | Large Hirshfeld Difference P1 -- F1 ..           | 0.16 Ang.  |
| PLAT241_ALERT_2_C | Check High Ueq as Compared to Neighbors for N6   |            |
| PLAT241_ALERT_2_C | Check High Ueq as Compared to Neighbors for C7   |            |
| PLAT241_ALERT_2_C | Check High Ueq as Compared to Neighbors for C9   |            |
| PLAT241_ALERT_2_C | Check High Ueq as Compared to Neighbors for C12  |            |
| PLAT241_ALERT_2_C | Check High Ueq as Compared to Neighbors for C16  |            |
| PLAT241_ALERT_2_C | Check High Ueq as Compared to Neighbors for C18  |            |
| PLAT242_ALERT_2_C | Check Low Ueq as Compared to Neighbors for C8    |            |
| PLAT242_ALERT_2_C | Check Low Ueq as Compared to Neighbors for C17   |            |
| PLAT244_ALERT_4_C | Low 'Solvent' Ueq as Compared to Neighbors of P1 |            |
| PLAT244_ALERT_4_C | Low 'Solvent' Ueq as Compared to Neighbors of P2 |            |
| PLAT244_ALERT_4_C | Low 'Solvent' Ueq as Compared to Neighbors of P3 |            |
| PLAT342_ALERT_3_C | Low Bond Precision on C-C Bonds .....            | 0.0189 Ang |
| PLAT362_ALERT_2_C | Short C(sp3)-C(sp2) Bond C1 - C2 ...             | 1.40 Ang.  |
| PLAT362_ALERT_2_C | Short C(sp3)-C(sp2) Bond C12 - C13 ...           | 1.40 Ang.  |

## ● Alert level G

|                   |                                                          |        |
|-------------------|----------------------------------------------------------|--------|
| PLAT003_ALERT_2_G | Number of Uiso or Uij Restrained Atom Sites ....         | 9      |
| PLAT005_ALERT_5_G | No _iucr_refine_instructions_details in the CIF          | ?      |
| PLAT072_ALERT_2_G | SHELXL First Parameter in WGHT Unusually Large.          | 0.13   |
| PLAT083_ALERT_2_G | SHELXL Second Parameter in WGHT Unusually Large.         | 54.74  |
| PLAT104_ALERT_1_G | The Reported Crystal System is Inconsistent with I212121 |        |
| PLAT194_ALERT_1_G | Missing _cell_measurement_reflms_used datum ....         | ?      |
| PLAT195_ALERT_1_G | Missing _cell_measurement_theta_max datum ....           | ?      |
| PLAT196_ALERT_1_G | Missing _cell_measurement_theta_min datum ....           | ?      |
| PLAT231_ALERT_4_G | Hirshfeld Test (Solvent) P3 -- F8 ..                     | 8.6 su |
| PLAT231_ALERT_4_G | Hirshfeld Test (Solvent) P3 -- F9 ..                     | 6.8 su |
| PLAT606_ALERT_4_G | VERY LARGE Solvent Accessible VOID(S) in Structure       | !      |
| PLAT710_ALERT_4_G | Delete 1-2-3 or 2-3-4 Linear Torsion Angle ... #         | 5      |
|                   | N6 -RU1 -N1 -C18 -98.00 8.00 1.555 1.555 1.555           | 1.555  |
| PLAT710_ALERT_4_G | Delete 1-2-3 or 2-3-4 Linear Torsion Angle ... #         | 10     |
|                   | N6 -RU1 -N1 -C1 20.00 8.00 1.555 1.555 1.555             | 1.555  |
| PLAT710_ALERT_4_G | Delete 1-2-3 or 2-3-4 Linear Torsion Angle ... #         | 15     |
|                   | N6 -RU1 -N1 -C12 143.00 8.00 1.555 1.555 1.555           | 1.555  |
| PLAT710_ALERT_4_G | Delete 1-2-3 or 2-3-4 Linear Torsion Angle ... #         | 57     |
|                   | N1 -RU1 -N6 -N7 -69.00 9.00 1.555 1.555 1.555            | 1.555  |
| PLAT710_ALERT_4_G | Delete 1-2-3 or 2-3-4 Linear Torsion Angle ... #         | 61     |
|                   | RU1 -N6 -N7 -N6 -160.80 1.40 1.555 1.555 1.555           | 2.655  |
| PLAT790_ALERT_4_G | Centre of Gravity not Within Unit Cell: Resd. #          | 4      |
|                   | F6 P                                                     |        |
| PLAT860_ALERT_3_G | Note: Number of Least-Squares Restraints .....           | 54     |
| PLAT869_ALERT_4_G | ALERTS Related to the use of SQUEEZE Suppressed          | !      |

0 **ALERT level A** = Most likely a serious problem - resolve or explain  
2 **ALERT level B** = A potentially serious problem, consider carefully  
29 **ALERT level C** = Check. Ensure it is not caused by an omission or oversight  
19 **ALERT level G** = General information/check it is not something unexpected

4 ALERT type 1 CIF construction/syntax error, inconsistent or missing data  
17 ALERT type 2 Indicator that the structure model may be wrong or deficient  
3 ALERT type 3 Indicator that the structure quality may be low  
25 ALERT type 4 Improvement, methodology, query or suggestion  
1 ALERT type 5 Informative message, check

---

It is advisable to attempt to resolve as many as possible of the alerts in all categories. Often the minor alerts point to easily fixed oversights, errors and omissions in your CIF or refinement strategy, so attention to these fine details can be worthwhile. In order to resolve some of the more serious problems it may be necessary to carry out additional measurements or structure refinements. However, the purpose of your study may justify the reported deviations and the more serious of these should normally be commented upon in the discussion or experimental section of a paper or in the "special\_details" fields of the CIF. checkCIF was carefully designed to identify outliers and unusual parameters, but every test has its limitations and alerts that are not important in a particular case may appear. Conversely, the absence of alerts does not guarantee there are no aspects of the results needing attention. It is up to the individual to critically assess their own results and, if necessary, seek expert advice.

### **Publication of your CIF in IUCr journals**

A basic structural check has been run on your CIF. These basic checks will be run on all CIFs submitted for publication in IUCr journals (*Acta Crystallographica*, *Journal of Applied Crystallography*, *Journal of Synchrotron Radiation*); however, if you intend to submit to *Acta Crystallographica Section C* or *E*, you should make sure that full publication checks are run on the final version of your CIF prior to submission.

### **Publication of your CIF in other journals**

Please refer to the *Notes for Authors* of the relevant journal for any special instructions relating to CIF submission.

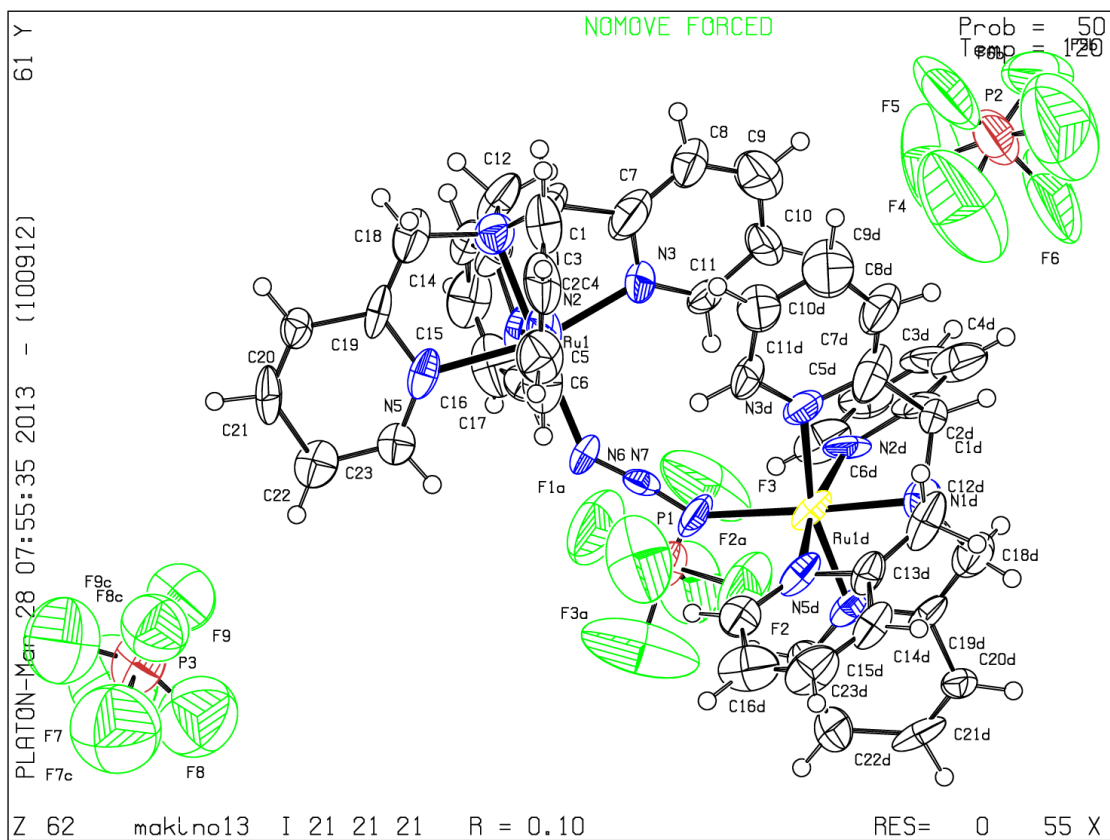

Supplement: Supplementary file 2 [file 4059997 › Revised CIF_ic-2013-00412f/(u-N3)[Ru(N4Py)]2.pdf]
