# Supplementary material
Source: publisher figshare collection journal article supplement (https://acs.figshare.com/ndownloader/files/4059997)
Supplement: Supplementary file 2 [file 4059997]

Archive with 21 entries (18 files):
- Revised CIF_ic-2013-00412f/
- Revised CIF_ic-2013-00412f/(u-N3)[Ru(N4Py)]2.pdf
- __MACOSX/
- __MACOSX/Revised CIF_ic-2013-00412f/
- __MACOSX/Revised CIF_ic-2013-00412f/._(u-N3)[Ru(N4Py)]2.pdf
- Revised CIF_ic-2013-00412f/.DS_Store
- __MACOSX/Revised CIF_ic-2013-00412f/._.DS_Store
- Revised CIF_ic-2013-00412f/[Ru(ClO4)(N4Py)].pdf
- __MACOSX/Revised CIF_ic-2013-00412f/._[Ru(ClO4)(N4Py)].pdf
- Revised CIF_ic-2013-00412f/[Ru(N3)(N4Py)].pdf
- __MACOSX/Revised CIF_ic-2013-00412f/._[Ru(N3)(N4Py)].pdf
- Revised CIF_ic-2013-00412f/[RuNCCH3)(N4Py)].pdf
- __MACOSX/Revised CIF_ic-2013-00412f/._[RuNCCH3)(N4Py)].pdf
- Revised CIF_ic-2013-00412f/Ru(ClO4)(N4Py)-130328.CIF
- __MACOSX/Revised CIF_ic-2013-00412f/._Ru(ClO4)(N4Py)-130328.CIF
- Revised CIF_ic-2013-00412f/Ru(N3)(N4Py)-130328.CIF
- __MACOSX/Revised CIF_ic-2013-00412f/._Ru(N3)(N4Py)-130328.CIF
- Revised CIF_ic-2013-00412f/Ru(N4Py)NCCH3-130328.CIF
- __MACOSX/Revised CIF_ic-2013-00412f/._Ru(N4Py)NCCH3-130328.CIF
- Revised CIF_ic-2013-00412f/u-N3-Ru(N4Py)-130328.CIF
- __MACOSX/Revised CIF_ic-2013-00412f/._u-N3-Ru(N4Py)-130328.CIF
