# Supplementary material
Source: publisher figshare collection journal article supplement (https://acs.figshare.com/ndownloader/files/4059997)
Supplement: Supplementary file 2 [file 4059997 › Revised CIF_ic-2013-00412f/Ru(ClO4)(N4Py)-130328.CIF]

 
data_kyo10 
 
_audit_creation_method            SHELXL-97 
_chemical_name_systematic 
; 
 ? 
; 
_chemical_name_common             ? 
_chemical_melting_point           ? 
_chemical_formula_moiety          ? 
_chemical_formula_sum 
 'C23 H21 Cl F6 N5 O4 P Ru' 
_chemical_formula_weight          712.94 
 
loop_ 
 _atom_type_symbol 
 _atom_type_description 
 _atom_type_scat_dispersion_real 
 _atom_type_scat_dispersion_imag 
 _atom_type_scat_source 
 'C'  'C'   0.0033   0.0016 
 'International Tables Vol C Tables 4.2.6.8 and 6.1.1.4' 
 'H'  'H'   0.0000   0.0000 
 'International Tables Vol C Tables 4.2.6.8 and 6.1.1.4' 
 'N'  'N'   0.0061   0.0033 
 'International Tables Vol C Tables 4.2.6.8 and 6.1.1.4' 
 'O'  'O'   0.0106   0.0060 
 'International Tables Vol C Tables 4.2.6.8 and 6.1.1.4' 
 'F'  'F'   0.0171   0.0103 
 'International Tables Vol C Tables 4.2.6.8 and 6.1.1.4' 
 'P'  'P'   0.1023   0.0942 
 'International Tables Vol C Tables 4.2.6.8 and 6.1.1.4' 
 'Ru'  'Ru'  -1.2594   0.8363 
 'International Tables Vol C Tables 4.2.6.8 and 6.1.1.4' 
 'Cl'  'Cl'   0.1484   0.1585 
 'International Tables Vol C Tables 4.2.6.8 and 6.1.1.4' 
 
_symmetry_cell_setting            ? 
_symmetry_space_group_name_H-M    'P n m a' 
 
loop_ 
 _symmetry_equiv_pos_as_xyz 
 'x, y, z' 
 '-x+1/2, -y, z+1/2' 
 'x+1/2, -y+1/2, -z+1/2' 
 '-x, y+1/2, -z' 
 '-x, -y, -z' 
 'x-1/2, y, -z-1/2' 
 '-x-1/2, y-1/2, z-1/2' 
 'x, -y-1/2, z' 
 
_cell_length_a                    9.7749(10) 
_cell_length_b                    21.936(2) 
_cell_length_c                    13.4714(14) 
_cell_angle_alpha                 90.00 
_cell_angle_beta                  90.00 
_cell_angle_gamma                 90.00 
_cell_volume                      2888.6(5) 
_cell_formula_units_Z             4 
_cell_measurement_temperature     120(2) 
_cell_measurement_reflns_used     ? 
_cell_measurement_theta_min       ? 
_cell_measurement_theta_max       ? 
 
_exptl_crystal_description        ? 
_exptl_crystal_colour             ? 
_exptl_crystal_size_max           0.21 
_exptl_crystal_size_mid           0.17 
_exptl_crystal_size_min           0.09 
_exptl_crystal_density_meas       ? 
_exptl_crystal_density_diffrn     1.639 
_exptl_crystal_density_method     'not measured' 
_exptl_crystal_F_000              1424 
_exptl_absorpt_coefficient_mu     0.768 
_exptl_absorpt_correction_type    multi-scan 
_exptl_absorpt_correction_T_min   0.8554 
_exptl_absorpt_correction_T_max   0.9341 
_exptl_absorpt_process_details    'SADABS V2008/1 (Bruker AXS)'  
 
_exptl_special_details 
; 
 ? 
; 
 
_diffrn_ambient_temperature       120(2) 
_diffrn_radiation_wavelength      0.71073 
_diffrn_radiation_type            MoK\a 
_diffrn_radiation_source          'fine-focus sealed tube' 
_diffrn_radiation_monochromator   graphite 
_diffrn_measurement_device_type   ? 
_diffrn_measurement_method        ? 
_diffrn_detector_area_resol_mean  ? 
_diffrn_standards_number          ? 
_diffrn_standards_interval_count  ? 
_diffrn_standards_interval_time   ? 
_diffrn_standards_decay_%         ? 
_diffrn_reflns_number             15712 
_diffrn_reflns_av_R_equivalents   0.0331 
_diffrn_reflns_av_sigmaI/netI     0.0287 
_diffrn_reflns_limit_h_min        -12 
_diffrn_reflns_limit_h_max        13 
_diffrn_reflns_limit_k_min        -22 
_diffrn_reflns_limit_k_max        28 
_diffrn_reflns_limit_l_min        -17 
_diffrn_reflns_limit_l_max        15 
_diffrn_reflns_theta_min          1.77 
_diffrn_reflns_theta_max          28.50 
_reflns_number_total              3546 
_reflns_number_gt                 2914 
_reflns_threshold_expression      >2sigma(I) 
 
_computing_data_collection        ? 
_computing_cell_refinement        ? 
_computing_data_reduction         ? 
_computing_structure_solution     'SHELXS-97 (Sheldrick, 1990)' 
_computing_structure_refinement   'SHELXL-97 (Sheldrick, 1997)' 
_computing_molecular_graphics     ? 
_computing_publication_material   ? 
 
_refine_special_details 
; 
 Refinement of F^2^ against ALL reflections.  The weighted R-factor wR and 
 goodness of fit S are based on F^2^, conventional R-factors R are based 
 on F, with F set to zero for negative F^2^. The threshold expression of 
 F^2^ > 2sigma(F^2^) is used only for calculating R-factors(gt) etc. and is 
 not relevant to the choice of reflections for refinement.  R-factors based 
 on F^2^ are statistically about twice as large as those based on F, and R- 
 factors based on ALL data will be even larger. 
; 
 
_refine_ls_structure_factor_coef  Fsqd  
_refine_ls_matrix_type            full 
_refine_ls_weighting_scheme       calc  
_refine_ls_weighting_details 
 'calc w=1/[\s^2^(Fo^2^)+(0.0667P)^2^+7.1317P] where P=(Fo^2^+2Fc^2^)/3' 
_atom_sites_solution_primary      direct 
_atom_sites_solution_secondary    difmap 
_atom_sites_solution_hydrogens    geom 
_refine_ls_hydrogen_treatment     constr 
_refine_ls_extinction_method      none 
_refine_ls_extinction_coef        ? 
_refine_ls_number_reflns          3546 
_refine_ls_number_parameters      205 
_refine_ls_number_restraints      12 
_refine_ls_R_factor_all           0.0525 
_refine_ls_R_factor_gt            0.0442 
_refine_ls_wR_factor_ref          0.1345 
_refine_ls_wR_factor_gt           0.1305 
_refine_ls_goodness_of_fit_ref    1.113 
_refine_ls_restrained_S_all       1.149 
_refine_ls_shift/su_max           0.001 
_refine_ls_shift/su_mean          0.000 
 
loop_ 
 _atom_site_label 
 _atom_site_type_symbol 
 _atom_site_fract_x 
 _atom_site_fract_y 
 _atom_site_fract_z 
 _atom_site_U_iso_or_equiv 
 _atom_site_adp_type 
 _atom_site_occupancy 
 _atom_site_symmetry_multiplicity 
 _atom_site_calc_flag 
 _atom_site_refinement_flags 
 _atom_site_disorder_assembly 
 _atom_site_disorder_group 
Ru1 Ru 0.89445(4) 0.2500 0.49828(3) 0.01356(14) Uani 1 2 d S . . 
P1 P 0.5000 0.5000 0.5000 0.0252(3) Uani 1 2 d S . . 
Cl1 Cl 0.56131(14) 0.2500 0.54530(10) 0.0303(3) Uani 1 2 d S . . 
F1 F 0.5997(3) 0.51465(13) 0.4100(2) 0.0477(8) Uani 1 1 d . . . 
F2 F 0.6271(3) 0.48104(14) 0.5671(2) 0.0497(8) Uani 1 1 d . . . 
F3 F 0.4855(3) 0.43082(12) 0.4644(2) 0.0370(6) Uani 1 1 d . . . 
O1 O 0.7028(4) 0.2500 0.5791(3) 0.0257(8) Uani 1 2 d S A . 
N1 N 1.0742(4) 0.2500 0.4259(3) 0.0148(8) Uani 1 2 d S . . 
N2 N 0.8463(3) 0.18639(13) 0.3924(2) 0.0165(6) Uani 1 1 d . . . 
N3 N 0.9862(3) 0.31530(13) 0.5851(2) 0.0162(6) Uani 1 1 d . . . 
C1 C 1.0192(5) 0.2500 0.3195(3) 0.0162(9) Uani 1 2 d S . . 
H1 H 1.0943 0.2500 0.2691 0.019 Uiso 1 2 calc SR . . 
C2 C 0.9277(3) 0.19428(16) 0.3106(3) 0.0176(7) Uani 1 1 d . . . 
C3 C 0.9222(4) 0.15686(16) 0.2287(3) 0.0191(7) Uani 1 1 d . . . 
H2 H 0.9790 0.1641 0.1727 0.023 Uiso 1 1 calc R . . 
C4 C 0.8305(4) 0.10781(16) 0.2303(3) 0.0210(7) Uani 1 1 d . . . 
H3 H 0.8244 0.0808 0.1754 0.025 Uiso 1 1 calc R . . 
C5 C 0.7491(4) 0.09925(17) 0.3129(3) 0.0221(7) Uani 1 1 d . . . 
H4 H 0.6861 0.0663 0.3149 0.027 Uiso 1 1 calc R . . 
C6 C 0.7591(4) 0.13872(16) 0.3930(3) 0.0191(7) Uani 1 1 d . . . 
H5 H 0.7031 0.1320 0.4496 0.023 Uiso 1 1 calc R . . 
C7 C 1.1539(4) 0.30694(16) 0.4513(2) 0.0181(7) Uani 1 1 d . . . 
H6 H 1.1382 0.3382 0.3995 0.022 Uiso 1 1 calc R . . 
H7 H 1.2528 0.2974 0.4526 0.022 Uiso 1 1 calc R . . 
C8 C 1.1109(3) 0.33196(15) 0.5512(3) 0.0168(7) Uani 1 1 d . . . 
C9 C 1.1921(4) 0.37362(16) 0.6012(3) 0.0200(7) Uani 1 1 d . . . 
H8 H 1.2797 0.3843 0.5763 0.024 Uiso 1 1 calc R . . 
C10 C 1.1437(4) 0.39931(17) 0.6879(3) 0.0232(7) Uani 1 1 d . . . 
H9 H 1.1974 0.4283 0.7230 0.028 Uiso 1 1 calc R . . 
C11 C 1.0158(4) 0.38240(16) 0.7232(3) 0.0219(7) Uani 1 1 d . . . 
H10 H 0.9804 0.3998 0.7825 0.026 Uiso 1 1 calc R . . 
C12 C 0.9410(4) 0.34012(16) 0.6710(3) 0.0198(7) Uani 1 1 d . . . 
H11 H 0.8545 0.3279 0.6961 0.024 Uiso 1 1 calc R . . 
O2 O 0.5162(5) 0.2500 0.4437(3) 0.0356(10) Uani 1 2 d S A . 
O5 O 0.5193(6) 0.3203(3) 0.5763(4) 0.0278(12) Uani 0.48 1 d PU A 1 
O6 O 0.4684(6) 0.2792(3) 0.6174(4) 0.0392(14) Uani 0.52 1 d PU . 2 
 
loop_ 
 _atom_site_aniso_label 
 _atom_site_aniso_U_11 
 _atom_site_aniso_U_22 
 _atom_site_aniso_U_33 
 _atom_site_aniso_U_23 
 _atom_site_aniso_U_13 
 _atom_site_aniso_U_12 
Ru1 0.0106(2) 0.0181(2) 0.0119(2) 0.000 0.00109(13) 0.000 
P1 0.0220(7) 0.0253(7) 0.0283(8) -0.0047(5) 0.0013(5) -0.0014(5) 
Cl1 0.0182(6) 0.0484(8) 0.0242(7) 0.000 0.0006(5) 0.000 
F1 0.0561(19) 0.0375(15) 0.0495(17) -0.0049(13) 0.0195(14) -0.0044(13) 
F2 0.0403(17) 0.0484(17) 0.0602(19) -0.0039(15) -0.0177(15) 0.0029(13) 
F3 0.0365(14) 0.0298(13) 0.0447(15) -0.0100(11) 0.0021(12) -0.0031(11) 
O1 0.0128(17) 0.050(2) 0.0147(17) 0.000 0.0015(14) 0.000 
N1 0.0133(18) 0.0182(19) 0.0130(18) 0.000 0.0016(15) 0.000 
N2 0.0130(13) 0.0205(14) 0.0159(13) 0.0009(11) 0.0003(11) 0.0011(11) 
N3 0.0160(14) 0.0184(13) 0.0141(13) -0.0004(11) -0.0005(11) 0.0006(11) 
C1 0.018(2) 0.016(2) 0.015(2) 0.000 0.0022(18) 0.000 
C2 0.0125(15) 0.0234(17) 0.0169(16) 0.0019(13) 0.0007(13) 0.0013(13) 
C3 0.0180(16) 0.0234(17) 0.0160(16) -0.0001(13) 0.0003(13) 0.0033(13) 
C4 0.0213(18) 0.0226(16) 0.0191(16) -0.0045(13) -0.0034(13) 0.0067(14) 
C5 0.0184(17) 0.0223(17) 0.0257(18) -0.0012(14) -0.0014(14) -0.0025(13) 
C6 0.0160(16) 0.0214(17) 0.0200(16) 0.0015(13) -0.0009(13) 0.0006(13) 
C7 0.0146(16) 0.0231(16) 0.0165(16) -0.0011(13) 0.0030(12) -0.0039(13) 
C8 0.0160(16) 0.0164(15) 0.0180(17) 0.0036(13) -0.0018(12) 0.0007(12) 
C9 0.0167(17) 0.0201(16) 0.0233(17) -0.0001(13) -0.0032(13) -0.0012(13) 
C10 0.0255(19) 0.0210(17) 0.0231(18) -0.0026(14) -0.0035(15) -0.0015(14) 
C11 0.0267(19) 0.0207(17) 0.0182(17) -0.0022(13) -0.0004(14) 0.0012(14) 
C12 0.0215(18) 0.0213(17) 0.0165(16) 0.0001(13) 0.0026(14) 0.0026(13) 
O2 0.033(2) 0.050(3) 0.024(2) 0.000 -0.0112(18) 0.000 
O5 0.0302(19) 0.0261(19) 0.0271(19) -0.0087(16) -0.0029(16) 0.0130(16) 
O6 0.023(2) 0.059(3) 0.035(2) -0.028(2) 0.0016(19) 0.011(2) 
 
_geom_special_details 
; 
 All esds (except the esd in the dihedral angle between two l.s. planes) 
 are estimated using the full covariance matrix.  The cell esds are taken 
 into account individually in the estimation of esds in distances, angles 
 and torsion angles; correlations between esds in cell parameters are only 
 used when they are defined by crystal symmetry.  An approximate (isotropic) 
 treatment of cell esds is used for estimating esds involving l.s. planes. 
; 
 
loop_ 
 _geom_bond_atom_site_label_1 
 _geom_bond_atom_site_label_2 
 _geom_bond_distance 
 _geom_bond_site_symmetry_2 
 _geom_bond_publ_flag 
Ru1 N1 2.009(4) . ? 
Ru1 N2 2.050(3) . ? 
Ru1 N2 2.050(3) 8_565 ? 
Ru1 N3 2.055(3) . ? 
Ru1 N3 2.055(3) 8_565 ? 
Ru1 O1 2.167(4) . ? 
P1 F1 1.588(3) . ? 
P1 F1 1.588(3) 5_666 ? 
P1 F2 1.592(3) 5_666 ? 
P1 F2 1.592(3) . ? 
P1 F3 1.598(2) . ? 
P1 F3 1.598(2) 5_666 ? 
Cl1 O2 1.438(4) . ? 
Cl1 O1 1.456(4) . ? 
Cl1 O6 1.476(5) 8_565 ? 
Cl1 O6 1.476(5) . ? 
Cl1 O5 1.651(5) 8_565 ? 
Cl1 O5 1.651(5) . ? 
N1 C7 1.511(4) 8_565 ? 
N1 C7 1.511(4) . ? 
N1 C1 1.531(6) . ? 
N2 C6 1.350(5) . ? 
N2 C2 1.369(4) . ? 
N3 C12 1.352(4) . ? 
N3 C8 1.353(4) . ? 
C1 C2 1.519(4) . ? 
C1 C2 1.519(4) 8_565 ? 
C2 C3 1.377(5) . ? 
C3 C4 1.401(5) . ? 
C4 C5 1.381(5) . ? 
C5 C6 1.387(5) . ? 
C7 C8 1.512(5) . ? 
C8 C9 1.386(5) . ? 
C9 C10 1.380(5) . ? 
C10 C11 1.389(5) . ? 
C11 C12 1.374(5) . ? 
O6 O6 1.281(13) 8_565 ? 
 
loop_ 
 _geom_angle_atom_site_label_1 
 _geom_angle_atom_site_label_2 
 _geom_angle_atom_site_label_3 
 _geom_angle 
 _geom_angle_site_symmetry_1 
 _geom_angle_site_symmetry_3 
 _geom_angle_publ_flag 
N1 Ru1 N2 82.13(12) . . ? 
N1 Ru1 N2 82.13(12) . 8_565 ? 
N2 Ru1 N2 85.77(16) . 8_565 ? 
N1 Ru1 N3 83.97(12) . . ? 
N2 Ru1 N3 166.05(11) . . ? 
N2 Ru1 N3 91.26(11) 8_565 . ? 
N1 Ru1 N3 83.97(12) . 8_565 ? 
N2 Ru1 N3 91.26(11) . 8_565 ? 
N2 Ru1 N3 166.05(11) 8_565 8_565 ? 
N3 Ru1 N3 88.36(16) . 8_565 ? 
N1 Ru1 O1 178.85(15) . . ? 
N2 Ru1 O1 98.71(11) . . ? 
N2 Ru1 O1 98.71(10) 8_565 . ? 
N3 Ru1 O1 95.21(10) . . ? 
N3 Ru1 O1 95.21(11) 8_565 . ? 
F1 P1 F1 180.000(1) . 5_666 ? 
F1 P1 F2 89.60(18) . 5_666 ? 
F1 P1 F2 90.40(18) 5_666 5_666 ? 
F1 P1 F2 90.40(18) . . ? 
F1 P1 F2 89.60(18) 5_666 . ? 
F2 P1 F2 180.000(1) 5_666 . ? 
F1 P1 F3 91.01(14) . . ? 
F1 P1 F3 88.99(15) 5_666 . ? 
F2 P1 F3 90.50(15) 5_666 . ? 
F2 P1 F3 89.50(15) . . ? 
F1 P1 F3 88.99(15) . 5_666 ? 
F1 P1 F3 91.01(14) 5_666 5_666 ? 
F2 P1 F3 89.50(15) 5_666 5_666 ? 
F2 P1 F3 90.50(15) . 5_666 ? 
F3 P1 F3 180.00(6) . 5_666 ? 
O2 Cl1 O1 126.1(2) . . ? 
O2 Cl1 O6 115.9(3) . 8_565 ? 
O1 Cl1 O6 112.2(3) . 8_565 ? 
O2 Cl1 O6 115.9(3) . . ? 
O1 Cl1 O6 112.2(3) . . ? 
O6 Cl1 O6 51.4(6) 8_565 . ? 
O2 Cl1 O5 99.5(2) . 8_565 ? 
O1 Cl1 O5 99.0(2) . 8_565 ? 
O6 Cl1 O5 43.5(3) 8_565 8_565 ? 
O6 Cl1 O5 94.9(4) . 8_565 ? 
O2 Cl1 O5 99.5(2) . . ? 
O1 Cl1 O5 99.0(2) . . ? 
O6 Cl1 O5 94.9(4) 8_565 . ? 
O6 Cl1 O5 43.5(3) . . ? 
O5 Cl1 O5 138.4(5) 8_565 . ? 
Cl1 O1 Ru1 131.6(2) . . ? 
C7 N1 C7 111.5(4) 8_565 . ? 
C7 N1 C1 113.2(2) 8_565 . ? 
C7 N1 C1 113.2(2) . . ? 
C7 N1 Ru1 109.9(2) 8_565 . ? 
C7 N1 Ru1 109.9(2) . . ? 
C1 N1 Ru1 98.5(3) . . ? 
C6 N2 C2 118.0(3) . . ? 
C6 N2 Ru1 131.9(2) . . ? 
C2 N2 Ru1 109.9(2) . . ? 
C12 N3 C8 118.3(3) . . ? 
C12 N3 Ru1 128.7(2) . . ? 
C8 N3 Ru1 112.9(2) . . ? 
C2 C1 C2 107.1(4) . 8_565 ? 
C2 C1 N1 106.3(3) . . ? 
C2 C1 N1 106.3(3) 8_565 . ? 
N2 C2 C3 123.2(3) . . ? 
N2 C2 C1 112.4(3) . . ? 
C3 C2 C1 124.4(3) . . ? 
C2 C3 C4 118.0(3) . . ? 
C5 C4 C3 119.1(3) . . ? 
C4 C5 C6 120.1(3) . . ? 
N2 C6 C5 121.6(3) . . ? 
N1 C7 C8 111.0(3) . . ? 
N3 C8 C9 122.0(3) . . ? 
N3 C8 C7 117.0(3) . . ? 
C9 C8 C7 120.9(3) . . ? 
C10 C9 C8 119.0(3) . . ? 
C9 C10 C11 119.3(3) . . ? 
C12 C11 C10 118.9(3) . . ? 
N3 C12 C11 122.4(3) . . ? 
O6 O6 Cl1 64.3(3) 8_565 . ? 
 
loop_ 
 _geom_torsion_atom_site_label_1 
 _geom_torsion_atom_site_label_2 
 _geom_torsion_atom_site_label_3 
 _geom_torsion_atom_site_label_4 
 _geom_torsion 
 _geom_torsion_site_symmetry_1 
 _geom_torsion_site_symmetry_2 
 _geom_torsion_site_symmetry_3 
 _geom_torsion_site_symmetry_4 
 _geom_torsion_publ_flag 
O2 Cl1 O1 Ru1 0.0 . . . . ? 
O6 Cl1 O1 Ru1 152.0(3) 8_565 . . . ? 
O6 Cl1 O1 Ru1 -152.0(3) . . . . ? 
O5 Cl1 O1 Ru1 108.8(2) 8_565 . . . ? 
O5 Cl1 O1 Ru1 -108.8(2) . . . . ? 
N1 Ru1 O1 Cl1 180.001(17) . . . . ? 
N2 Ru1 O1 Cl1 -43.51(8) . . . . ? 
N2 Ru1 O1 Cl1 43.51(8) 8_565 . . . ? 
N3 Ru1 O1 Cl1 135.59(8) . . . . ? 
N3 Ru1 O1 Cl1 -135.59(8) 8_565 . . . ? 
N2 Ru1 N1 C7 -75.1(2) . . . 8_565 ? 
N2 Ru1 N1 C7 -161.9(3) 8_565 . . 8_565 ? 
N3 Ru1 N1 C7 106.0(3) . . . 8_565 ? 
N3 Ru1 N1 C7 17.0(2) 8_565 . . 8_565 ? 
O1 Ru1 N1 C7 61.5(2) . . . 8_565 ? 
N2 Ru1 N1 C7 161.9(3) . . . . ? 
N2 Ru1 N1 C7 75.1(2) 8_565 . . . ? 
N3 Ru1 N1 C7 -17.0(2) . . . . ? 
N3 Ru1 N1 C7 -106.0(2) 8_565 . . . ? 
O1 Ru1 N1 C7 -61.5(2) . . . . ? 
N2 Ru1 N1 C1 43.40(8) . . . . ? 
N2 Ru1 N1 C1 -43.40(8) 8_565 . . . ? 
N3 Ru1 N1 C1 -135.51(8) . . . . ? 
N3 Ru1 N1 C1 135.51(8) 8_565 . . . ? 
O1 Ru1 N1 C1 179.999(15) . . . . ? 
N1 Ru1 N2 C6 151.4(3) . . . . ? 
N2 Ru1 N2 C6 -126.0(3) 8_565 . . . ? 
N3 Ru1 N2 C6 155.9(4) . . . . ? 
N3 Ru1 N2 C6 67.7(3) 8_565 . . . ? 
O1 Ru1 N2 C6 -27.8(3) . . . . ? 
N1 Ru1 N2 C2 -23.9(2) . . . . ? 
N2 Ru1 N2 C2 58.7(3) 8_565 . . . ? 
N3 Ru1 N2 C2 -19.4(6) . . . . ? 
N3 Ru1 N2 C2 -107.7(2) 8_565 . . . ? 
O1 Ru1 N2 C2 156.9(2) . . . . ? 
N1 Ru1 N3 C12 -170.7(3) . . . . ? 
N2 Ru1 N3 C12 -175.2(4) . . . . ? 
N2 Ru1 N3 C12 107.3(3) 8_565 . . . ? 
N3 Ru1 N3 C12 -86.6(3) 8_565 . . . ? 
O1 Ru1 N3 C12 8.5(3) . . . . ? 
N1 Ru1 N3 C8 5.8(2) . . . . ? 
N2 Ru1 N3 C8 1.3(6) . . . . ? 
N2 Ru1 N3 C8 -76.1(2) 8_565 . . . ? 
N3 Ru1 N3 C8 89.9(2) 8_565 . . . ? 
O1 Ru1 N3 C8 -175.0(2) . . . . ? 
C7 N1 C1 C2 59.0(4) 8_565 . . . ? 
C7 N1 C1 C2 -172.9(3) . . . . ? 
Ru1 N1 C1 C2 -56.9(2) . . . . ? 
C7 N1 C1 C2 172.9(3) 8_565 . . 8_565 ? 
C7 N1 C1 C2 -59.0(4) . . . 8_565 ? 
Ru1 N1 C1 C2 56.9(2) . . . 8_565 ? 
C6 N2 C2 C3 1.5(5) . . . . ? 
Ru1 N2 C2 C3 177.6(3) . . . . ? 
C6 N2 C2 C1 179.3(3) . . . . ? 
Ru1 N2 C2 C1 -4.7(3) . . . . ? 
C2 C1 C2 N2 -70.9(4) 8_565 . . . ? 
N1 C1 C2 N2 42.4(4) . . . . ? 
C2 C1 C2 C3 106.8(4) 8_565 . . . ? 
N1 C1 C2 C3 -139.9(4) . . . . ? 
N2 C2 C3 C4 -1.2(5) . . . . ? 
C1 C2 C3 C4 -178.6(3) . . . . ? 
C2 C3 C4 C5 0.5(5) . . . . ? 
C3 C4 C5 C6 -0.3(5) . . . . ? 
C2 N2 C6 C5 -1.3(5) . . . . ? 
Ru1 N2 C6 C5 -176.3(3) . . . . ? 
C4 C5 C6 N2 0.7(5) . . . . ? 
C7 N1 C7 C8 -97.3(4) 8_565 . . . ? 
C1 N1 C7 C8 133.8(3) . . . . ? 
Ru1 N1 C7 C8 24.8(3) . . . . ? 
C12 N3 C8 C9 -0.5(5) . . . . ? 
Ru1 N3 C8 C9 -177.4(3) . . . . ? 
C12 N3 C8 C7 -175.7(3) . . . . ? 
Ru1 N3 C8 C7 7.4(4) . . . . ? 
N1 C7 C8 N3 -21.6(4) . . . . ? 
N1 C7 C8 C9 163.1(3) . . . . ? 
N3 C8 C9 C10 -0.6(5) . . . . ? 
C7 C8 C9 C10 174.4(3) . . . . ? 
C8 C9 C10 C11 0.6(5) . . . . ? 
C9 C10 C11 C12 0.4(5) . . . . ? 
C8 N3 C12 C11 1.5(5) . . . . ? 
Ru1 N3 C12 C11 177.9(3) . . . . ? 
C10 C11 C12 N3 -1.5(6) . . . . ? 
O2 Cl1 O6 O6 103.5(2) . . . 8_565 ? 
O1 Cl1 O6 O6 -101.4(2) . . . 8_565 ? 
O5 Cl1 O6 O6 0.5(2) 8_565 . . 8_565 ? 
O5 Cl1 O6 O6 179.3(3) . . . 8_565 ? 
 
_diffrn_measured_fraction_theta_max    0.946 
_diffrn_reflns_theta_full              28.50 
_diffrn_measured_fraction_theta_full   0.946 
_refine_diff_density_max    1.732 
_refine_diff_density_min   -1.115 
_refine_diff_density_rms    0.123 
