# Supplementary material
Source: publisher figshare collection journal article supplement (https://acs.figshare.com/ndownloader/files/4059997)
Supplement: Supplementary file 2 [file 4059997 › Revised CIF_ic-2013-00412f/u-N3-Ru(N4Py)-130328.CIF]

 
data_makino13 
 
_audit_creation_method            SHELXL-97 
_chemical_name_systematic 
; 
 ? 
; 
_chemical_name_common             ? 
_chemical_melting_point           ? 
_chemical_formula_moiety          ? 
_chemical_formula_sum 
 'C46 H42 F18 N13 P3 Ru2' 
_chemical_formula_weight          1413.98 
 
loop_ 
 _atom_type_symbol 
 _atom_type_description 
 _atom_type_scat_dispersion_real 
 _atom_type_scat_dispersion_imag 
 _atom_type_scat_source 
 'C'  'C'   0.0033   0.0016 
 'International Tables Vol C Tables 4.2.6.8 and 6.1.1.4' 
 'H'  'H'   0.0000   0.0000 
 'International Tables Vol C Tables 4.2.6.8 and 6.1.1.4' 
 'N'  'N'   0.0061   0.0033 
 'International Tables Vol C Tables 4.2.6.8 and 6.1.1.4' 
 'F'  'F'   0.0171   0.0103 
 'International Tables Vol C Tables 4.2.6.8 and 6.1.1.4' 
 'P'  'P'   0.1023   0.0942 
 'International Tables Vol C Tables 4.2.6.8 and 6.1.1.4' 
 'Ru'  'Ru'  -1.2594   0.8363 
 'International Tables Vol C Tables 4.2.6.8 and 6.1.1.4' 
 
_symmetry_cell_setting            ? 
_symmetry_space_group_name_H-M    'I 21 21 21'
 
loop_ 
 _symmetry_equiv_pos_as_xyz 
 'x, y, z' 
 '-x, -y+1/2, z' 
 'x, -y, -z+1/2' 
 '-x+1/2, y, -z' 
 'x+1/2, y+1/2, z+1/2' 
 '-x+1/2, -y+1, z+1/2' 
 'x+1/2, -y+1/2, -z+1' 
 '-x+1, y+1/2, -z+1/2' 
 
_cell_length_a                    12.914(4) 
_cell_length_b                    13.120(4) 
_cell_length_c                    39.995(13) 
_cell_angle_alpha                 90.00 
_cell_angle_beta                  90.00 
_cell_angle_gamma                 90.00 
_cell_volume                      6776(4) 
_cell_formula_units_Z             4 
_cell_measurement_temperature     120(2) 
_cell_measurement_reflns_used     ? 
_cell_measurement_theta_min       ? 
_cell_measurement_theta_max       ? 
 
_exptl_crystal_description        ? 
_exptl_crystal_colour             ? 
_exptl_crystal_size_max           0.16 
_exptl_crystal_size_mid           0.12 
_exptl_crystal_size_min           0.04 
_exptl_crystal_density_meas       ? 
_exptl_crystal_density_diffrn     1.386 
_exptl_crystal_density_method     'not measured' 
_exptl_crystal_F_000              2816 
_exptl_absorpt_coefficient_mu     0.605 
_exptl_absorpt_correction_type    multi-scan 
_exptl_absorpt_correction_T_min   0.9094 
_exptl_absorpt_correction_T_max   0.9762 
_exptl_absorpt_process_details    'SADABS V2008/1 (Bruker AXS)' 
 
_exptl_special_details 
; 
 ? 
; 
 
_diffrn_ambient_temperature       120(2) 
_diffrn_radiation_wavelength      0.71073 
_diffrn_radiation_type            MoK\a 
_diffrn_radiation_source          'fine-focus sealed tube' 
_diffrn_radiation_monochromator   graphite 
_diffrn_measurement_device_type   ? 
_diffrn_measurement_method        ? 
_diffrn_detector_area_resol_mean  ? 
_diffrn_standards_number          ? 
_diffrn_standards_interval_count  ? 
_diffrn_standards_interval_time   ? 
_diffrn_standards_decay_%         ? 
_diffrn_reflns_number             17379 
_diffrn_reflns_av_R_equivalents   0.0689 
_diffrn_reflns_av_sigmaI/netI     0.0944 
_diffrn_reflns_limit_h_min        -16 
_diffrn_reflns_limit_h_max        15 
_diffrn_reflns_limit_k_min        -16 
_diffrn_reflns_limit_k_max        13 
_diffrn_reflns_limit_l_min        -46 
_diffrn_reflns_limit_l_max        49 
_diffrn_reflns_theta_min          1.63 
_diffrn_reflns_theta_max          26.33 
_reflns_number_total              6864 
_reflns_number_gt                 5222 
_reflns_threshold_expression      >2sigma(I) 
 
_computing_data_collection        ? 
_computing_cell_refinement        ? 
_computing_data_reduction         ? 
_computing_structure_solution     'SHELXS-97 (Sheldrick, 1990)' 
_computing_structure_refinement   'SHELXL-97 (Sheldrick, 1997)' 
_computing_molecular_graphics     ? 
_computing_publication_material   ? 
 
_refine_special_details 
; 
 Refinement of F^2^ against ALL reflections.  The weighted R-factor wR and 
 goodness of fit S are based on F^2^, conventional R-factors R are based 
 on F, with F set to zero for negative F^2^. The threshold expression of 
 F^2^ > 2sigma(F^2^) is used only for calculating R-factors(gt) etc. and is 
 not relevant to the choice of reflections for refinement.  R-factors based 
 on F^2^ are statistically about twice as large as those based on F, and R- 
 factors based on ALL data will be even larger. 
; 
 
_refine_ls_structure_factor_coef  Fsqd  
_refine_ls_matrix_type            full 
_refine_ls_weighting_scheme       calc  
_refine_ls_weighting_details 
 'calc w=1/[\s^2^(Fo^2^)+(0.1307P)^2^+54.7420P] where P=(Fo^2^+2Fc^2^)/3' 
_atom_sites_solution_primary      direct 
_atom_sites_solution_secondary    difmap 
_atom_sites_solution_hydrogens    geom 
_refine_ls_hydrogen_treatment     constr 
_refine_ls_extinction_method      none 
_refine_ls_extinction_coef        ? 
_refine_ls_abs_structure_details 
 'Flack H D (1983), Acta Cryst. A39, 876-881' 
_refine_ls_abs_structure_Flack    0.17(9) 
_refine_ls_number_reflns          6864 
_refine_ls_number_parameters      372 
_refine_ls_number_restraints      54 
_refine_ls_R_factor_all           0.1180 
_refine_ls_R_factor_gt            0.0988 
_refine_ls_wR_factor_ref          0.2594 
_refine_ls_wR_factor_gt           0.2474 
_refine_ls_goodness_of_fit_ref    1.039 
_refine_ls_restrained_S_all       1.050 
_refine_ls_shift/su_max           0.016 
_refine_ls_shift/su_mean          0.002 
 
loop_ 
 _atom_site_label 
 _atom_site_type_symbol 
 _atom_site_fract_x 
 _atom_site_fract_y 
 _atom_site_fract_z 
 _atom_site_U_iso_or_equiv 
 _atom_site_adp_type 
 _atom_site_occupancy 
 _atom_site_symmetry_multiplicity 
 _atom_site_calc_flag 
 _atom_site_refinement_flags 
 _atom_site_disorder_assembly 
 _atom_site_disorder_group 
Ru1 Ru 0.39395(6) 0.06376(6) 0.08515(3) 0.0488(3) Uani 1 1 d . . . 
P1 P 0.2500 0.4551(3) 0.0000 0.0514(10) Uani 1 2 d S . . 
P2 P 0.3720(9) 0.5000 0.2500 0.111(3) Uani 1 2 d S . . 
P3 P 0.5000 -0.2500 -0.1090(2) 0.091(2) Uani 1 2 d SU . . 
F1 F 0.3360(12) 0.3765(10) 0.0060(4) 0.153(6) Uani 1 1 d . . . 
F2 F 0.3325(10) 0.5327(9) 0.0122(4) 0.138(5) Uani 1 1 d . . . 
F3 F 0.2090(9) 0.4636(19) 0.0356(3) 0.209(11) Uani 1 1 d . . . 
F4 F 0.464(2) 0.468(3) 0.2248(7) 0.307(17) Uani 1 1 d . . . 
F5 F 0.310(3) 0.4648(12) 0.2227(5) 0.262(15) Uani 1 1 d . . . 
F6 F 0.394(3) 0.6038(12) 0.2378(3) 0.34(2) Uani 1 1 d . . . 
F7 F 0.404(2) -0.226(2) -0.1311(6) 0.252(10) Uani 1 1 d U . . 
F8 F 0.5386(17) -0.1546(16) -0.1175(6) 0.205(8) Uani 1 1 d U . . 
F9 F 0.4160(11) -0.2068(10) -0.0830(4) 0.141(4) Uani 1 1 d U . . 
N1 N 0.3271(8) -0.0389(7) 0.1160(3) 0.052(2) Uani 1 1 d . . . 
N2 N 0.5255(9) 0.0057(8) 0.1042(2) 0.060(3) Uani 1 1 d . . . 
N3 N 0.3852(8) 0.1534(6) 0.1276(2) 0.048(2) Uani 1 1 d . . . 
N4 N 0.2445(8) 0.0988(7) 0.0716(3) 0.055(3) Uani 1 1 d . . . 
N5 N 0.3925(7) -0.0549(6) 0.0515(2) 0.0480(19) Uani 1 1 d U . . 
N6 N 0.4711(9) 0.1711(8) 0.0543(3) 0.063(3) Uani 1 1 d . . . 
N7 N 0.5000 0.2500 0.0557(2) 0.033(3) Uani 1 2 d S . . 
C1 C 0.3994(13) -0.0234(8) 0.1455(3) 0.065(4) Uani 1 1 d . . . 
H1 H 0.3785 -0.0674 0.1648 0.078 Uiso 1 1 calc R . . 
C2 C 0.5029(11) -0.0409(8) 0.1366(3) 0.060(3) Uani 1 1 d . . . 
C3 C 0.5760(13) -0.0960(12) 0.1546(4) 0.081(4) Uani 1 1 d U . . 
H2 H 0.5603 -0.1287 0.1751 0.097 Uiso 1 1 calc R . . 
C4 C 0.6768(12) -0.0997(11) 0.1397(4) 0.073(4) Uani 1 1 d U . . 
H3 H 0.7310 -0.1335 0.1514 0.087 Uiso 1 1 calc R . . 
C5 C 0.6973(10) -0.0585(13) 0.1107(4) 0.074(4) Uani 1 1 d U . . 
H4 H 0.7646 -0.0662 0.1015 0.089 Uiso 1 1 calc R . . 
C6 C 0.6209(9) -0.0018(10) 0.0925(4) 0.068(4) Uani 1 1 d . . . 
H5 H 0.6388 0.0303 0.0720 0.081 Uiso 1 1 calc R . . 
C7 C 0.3848(14) 0.0916(10) 0.1540(4) 0.086(5) Uani 1 1 d . . . 
C8 C 0.3671(12) 0.1368(10) 0.1844(4) 0.074(4) Uani 1 1 d . . . 
H6 H 0.3505 0.0919 0.2022 0.089 Uiso 1 1 calc R . . 
C9 C 0.3701(18) 0.2306(13) 0.1918(4) 0.103(7) Uani 1 1 d . . . 
H7 H 0.3747 0.2564 0.2139 0.124 Uiso 1 1 calc R . . 
C10 C 0.3656(14) 0.2903(10) 0.1634(3) 0.074(4) Uani 1 1 d . . . 
H8 H 0.3570 0.3618 0.1660 0.089 Uiso 1 1 calc R . . 
C11 C 0.3729(8) 0.2511(8) 0.1318(3) 0.048(3) Uani 1 1 d . . . 
H9 H 0.3690 0.2951 0.1129 0.058 Uiso 1 1 calc R . . 
C12 C 0.2137(9) -0.0072(9) 0.1195(5) 0.072(4) Uani 1 1 d . . . 
H10 H 0.1708 -0.0686 0.1233 0.086 Uiso 1 1 calc R . . 
H11 H 0.2062 0.0378 0.1392 0.086 Uiso 1 1 calc R . . 
C13 C 0.1778(8) 0.0439(8) 0.0911(3) 0.048(3) Uani 1 1 d . . . 
C14 C 0.0695(8) 0.0489(7) 0.0810(4) 0.051(3) Uani 1 1 d . . . 
H12 H 0.0196 0.0107 0.0931 0.061 Uiso 1 1 calc R . . 
C15 C 0.0381(10) 0.1063(11) 0.0548(4) 0.073(4) Uani 1 1 d . . . 
H13 H -0.0333 0.1085 0.0491 0.088 Uiso 1 1 calc R . . 
C16 C 0.1035(13) 0.1578(12) 0.0376(4) 0.081(4) Uani 1 1 d . . . 
H14 H 0.0805 0.1965 0.0190 0.097 Uiso 1 1 calc R . . 
C17 C 0.2126(9) 0.1573(9) 0.0465(3) 0.050(3) Uani 1 1 d . . . 
H15 H 0.2606 0.1983 0.0346 0.060 Uiso 1 1 calc R . . 
C18 C 0.3346(12) -0.1452(9) 0.1012(4) 0.068(4) Uani 1 1 d . . . 
H16 H 0.3902 -0.1835 0.1127 0.082 Uiso 1 1 calc R . . 
H17 H 0.2685 -0.1817 0.1050 0.082 Uiso 1 1 calc R . . 
C19 C 0.3564(7) -0.1413(7) 0.0657(3) 0.046(3) Uani 1 1 d . . . 
C20 C 0.3481(8) -0.2279(8) 0.0434(3) 0.041(2) Uani 1 1 d . . . 
H18 H 0.3246 -0.2908 0.0524 0.049 Uiso 1 1 calc R . . 
C21 C 0.3704(9) -0.2243(9) 0.0128(4) 0.061(4) Uani 1 1 d . . . 
H19 H 0.3643 -0.2849 -0.0001 0.073 Uiso 1 1 calc R . . 
C22 C 0.4059(9) -0.1296(8) -0.0041(3) 0.054(3) Uani 1 1 d . . . 
H20 H 0.4203 -0.1239 -0.0273 0.065 Uiso 1 1 calc R . . 
C23 C 0.4155(8) -0.0483(8) 0.0195(3) 0.044(2) Uani 1 1 d U . . 
H21 H 0.4402 0.0154 0.0115 0.053 Uiso 1 1 calc R . . 
 
loop_ 
 _atom_site_aniso_label 
 _atom_site_aniso_U_11 
 _atom_site_aniso_U_22 
 _atom_site_aniso_U_33 
 _atom_site_aniso_U_23 
 _atom_site_aniso_U_13 
 _atom_site_aniso_U_12 
Ru1 0.0412(4) 0.0308(4) 0.0745(6) -0.0156(4) -0.0021(5) -0.0118(4) 
P1 0.0365(18) 0.040(2) 0.078(3) 0.000 -0.0030(19) 0.000 
P2 0.192(9) 0.084(4) 0.056(3) -0.018(3) 0.000 0.000 
P3 0.064(3) 0.062(3) 0.148(6) 0.000 0.000 0.032(3) 
F1 0.173(13) 0.122(9) 0.165(12) -0.016(9) -0.069(10) 0.076(9) 
F2 0.137(9) 0.108(9) 0.169(11) 0.008(8) -0.054(9) -0.066(7) 
F3 0.084(7) 0.45(3) 0.094(8) -0.077(14) 0.003(6) -0.076(13) 
F4 0.27(3) 0.39(4) 0.27(3) -0.16(3) 0.01(2) 0.08(3) 
F5 0.49(4) 0.128(13) 0.171(15) -0.019(11) -0.21(2) 0.062(17) 
F6 0.84(7) 0.117(11) 0.064(7) -0.024(7) -0.08(2) 0.01(2) 
F7 0.250(12) 0.252(12) 0.254(12) -0.001(8) -0.012(8) 0.017(8) 
F8 0.208(10) 0.179(10) 0.230(10) 0.013(7) 0.010(7) 0.008(7) 
F9 0.147(7) 0.141(7) 0.136(7) 0.003(6) -0.004(6) 0.018(6) 
N1 0.054(5) 0.043(5) 0.059(6) -0.001(4) 0.008(5) 0.002(4) 
N2 0.069(7) 0.064(6) 0.048(6) -0.012(5) -0.038(5) -0.013(5) 
N3 0.052(5) 0.042(4) 0.051(5) -0.012(4) -0.003(5) -0.015(4) 
N4 0.052(5) 0.028(4) 0.084(7) -0.017(4) 0.001(5) -0.008(4) 
N5 0.031(3) 0.032(3) 0.081(5) -0.007(4) -0.016(4) -0.005(4) 
N6 0.087(8) 0.040(5) 0.062(6) -0.009(4) 0.013(6) -0.040(6) 
N7 0.023(5) 0.059(8) 0.018(5) 0.000 0.000 -0.009(5) 
C1 0.102(10) 0.041(5) 0.051(7) 0.017(5) -0.028(8) -0.037(7) 
C2 0.084(9) 0.040(6) 0.054(7) -0.031(5) -0.028(6) 0.008(6) 
C3 0.093(8) 0.070(7) 0.081(7) -0.032(6) -0.016(6) -0.009(6) 
C4 0.077(7) 0.072(7) 0.070(7) -0.020(6) -0.052(6) -0.002(6) 
C5 0.054(6) 0.089(7) 0.080(7) -0.012(7) -0.015(5) -0.010(6) 
C6 0.037(6) 0.062(7) 0.105(11) -0.028(7) -0.015(6) 0.013(5) 
C7 0.099(11) 0.045(7) 0.114(13) 0.001(7) 0.019(11) -0.026(8) 
C8 0.092(11) 0.041(6) 0.089(10) -0.010(6) 0.012(8) -0.017(7) 
C9 0.16(2) 0.074(10) 0.075(10) -0.014(8) 0.033(12) 0.001(11) 
C10 0.126(14) 0.047(7) 0.048(7) -0.015(5) 0.023(8) 0.001(8) 
C11 0.047(7) 0.038(5) 0.060(7) -0.002(4) 0.020(5) -0.016(4) 
C12 0.049(7) 0.038(6) 0.129(13) 0.002(7) 0.014(8) -0.013(5) 
C13 0.036(5) 0.039(6) 0.070(8) 0.004(5) 0.002(5) -0.014(4) 
C14 0.037(4) 0.032(5) 0.083(8) -0.012(6) 0.015(5) -0.005(4) 
C15 0.038(6) 0.066(8) 0.115(12) -0.013(8) -0.015(8) 0.002(6) 
C16 0.069(9) 0.078(9) 0.094(11) -0.024(8) -0.023(9) 0.029(9) 
C17 0.053(6) 0.051(6) 0.046(6) -0.011(5) 0.018(5) -0.002(5) 
C18 0.078(9) 0.039(6) 0.089(10) -0.002(6) -0.019(8) -0.007(6) 
C19 0.032(5) 0.019(4) 0.088(9) -0.012(5) -0.018(5) 0.000(3) 
C20 0.043(5) 0.037(5) 0.042(6) -0.001(4) -0.016(5) -0.005(4) 
C21 0.044(7) 0.050(6) 0.089(10) -0.038(6) -0.019(6) -0.007(5) 
C22 0.056(7) 0.039(5) 0.068(7) 0.013(5) -0.016(6) 0.017(5) 
C23 0.043(5) 0.040(4) 0.050(5) 0.002(4) -0.009(4) 0.006(4) 
 
_geom_special_details 
; 
 All esds (except the esd in the dihedral angle between two l.s. planes) 
 are estimated using the full covariance matrix.  The cell esds are taken 
 into account individually in the estimation of esds in distances, angles 
 and torsion angles; correlations between esds in cell parameters are only 
 used when they are defined by crystal symmetry.  An approximate (isotropic) 
 treatment of cell esds is used for estimating esds involving l.s. planes. 
; 
 
loop_ 
 _geom_bond_atom_site_label_1 
 _geom_bond_atom_site_label_2 
 _geom_bond_distance 
 _geom_bond_site_symmetry_2 
 _geom_bond_publ_flag 
Ru1 N2 2.012(10) . ? 
Ru1 N1 2.022(10) . ? 
Ru1 N4 2.056(10) . ? 
Ru1 N5 2.057(8) . ? 
Ru1 N3 2.067(8) . ? 
Ru1 N6 2.121(10) . ? 
P1 F3 1.523(12) 4 ? 
P1 F3 1.523(12) . ? 
P1 F1 1.535(11) 4 ? 
P1 F1 1.535(11) . ? 
P1 F2 1.551(10) 4 ? 
P1 F2 1.551(10) . ? 
P2 F5 1.430(17) . ? 
P2 F5 1.430(17) 3_565 ? 
P2 F6 1.473(19) 3_565 ? 
P2 F6 1.473(19) . ? 
P2 F4 1.61(3) 3_565 ? 
P2 F4 1.61(3) . ? 
P3 F8 1.39(2) 2_645 ? 
P3 F8 1.39(2) . ? 
P3 F7 1.56(3) . ? 
P3 F7 1.56(3) 2_645 ? 
P3 F9 1.606(15) 2_645 ? 
P3 F9 1.606(15) . ? 
N1 C18 1.517(15) . ? 
N1 C1 1.517(16) . ? 
N1 C12 1.528(16) . ? 
N2 C6 1.322(17) . ? 
N2 C2 1.463(18) . ? 
N3 C11 1.303(13) . ? 
N3 C7 1.333(18) . ? 
N4 C17 1.329(16) . ? 
N4 C13 1.366(14) . ? 
N5 C23 1.318(14) . ? 
N5 C19 1.351(14) . ? 
N6 N7 1.103(9) . ? 
N7 N6 1.103(9) 2_655 ? 
C1 C2 1.40(2) . ? 
C1 C7 1.559(18) . ? 
C2 C3 1.39(2) . ? 
C3 C4 1.43(2) . ? 
C4 C5 1.31(2) . ? 
C5 C6 1.435(19) . ? 
C7 C8 1.37(2) . ? 
C8 C9 1.27(2) . ? 
C9 C10 1.38(2) . ? 
C10 C11 1.369(16) . ? 
C12 C13 1.399(19) . ? 
C13 C14 1.457(15) . ? 
C14 C15 1.35(2) . ? 
C15 C16 1.28(2) . ? 
C16 C17 1.45(2) . ? 
C18 C19 1.448(19) . ? 
C19 C20 1.448(14) . ? 
C20 C21 1.259(17) . ? 
C21 C22 1.487(18) . ? 
C22 C23 1.429(16) . ? 
 
loop_ 
 _geom_angle_atom_site_label_1 
 _geom_angle_atom_site_label_2 
 _geom_angle_atom_site_label_3 
 _geom_angle 
 _geom_angle_site_symmetry_1 
 _geom_angle_site_symmetry_3 
 _geom_angle_publ_flag 
N2 Ru1 N1 82.9(5) . . ? 
N2 Ru1 N4 167.6(4) . . ? 
N1 Ru1 N4 84.8(4) . . ? 
N2 Ru1 N5 88.2(4) . . ? 
N1 Ru1 N5 83.7(4) . . ? 
N4 Ru1 N5 89.4(3) . . ? 
N2 Ru1 N3 87.1(4) . . ? 
N1 Ru1 N3 81.6(4) . . ? 
N4 Ru1 N3 92.1(4) . . ? 
N5 Ru1 N3 165.1(4) . . ? 
N2 Ru1 N6 94.3(5) . . ? 
N1 Ru1 N6 177.1(5) . . ? 
N4 Ru1 N6 98.0(5) . . ? 
N5 Ru1 N6 97.2(4) . . ? 
N3 Ru1 N6 97.2(4) . . ? 
F3 P1 F3 171.7(19) 4 . ? 
F3 P1 F1 98.9(10) 4 4 ? 
F3 P1 F1 86.7(9) . 4 ? 
F3 P1 F1 86.7(9) 4 . ? 
F3 P1 F1 98.9(10) . . ? 
F1 P1 F1 95.5(12) 4 . ? 
F3 P1 F2 84.2(8) 4 4 ? 
F3 P1 F2 90.4(10) . 4 ? 
F1 P1 F2 84.0(8) 4 4 ? 
F1 P1 F2 170.6(9) . 4 ? 
F3 P1 F2 90.4(10) 4 . ? 
F3 P1 F2 84.2(8) . . ? 
F1 P1 F2 170.6(9) 4 . ? 
F1 P1 F2 84.0(8) . . ? 
F2 P1 F2 98.1(10) 4 . ? 
F5 P2 F5 112(3) . 3_565 ? 
F5 P2 F6 93.5(12) . 3_565 ? 
F5 P2 F6 98.9(13) 3_565 3_565 ? 
F5 P2 F6 98.9(13) . . ? 
F5 P2 F6 93.5(12) 3_565 . ? 
F6 P2 F6 158(3) 3_565 . ? 
F5 P2 F4 167(2) . 3_565 ? 
F5 P2 F4 81.5(15) 3_565 3_565 ? 
F6 P2 F4 84.0(19) 3_565 3_565 ? 
F6 P2 F4 79.7(17) . 3_565 ? 
F5 P2 F4 81.5(15) . . ? 
F5 P2 F4 167(2) 3_565 . ? 
F6 P2 F4 79.7(17) 3_565 . ? 
F6 P2 F4 84.0(19) . . ? 
F4 P2 F4 85(2) 3_565 . ? 
F8 P3 F8 152(2) 2_645 . ? 
F8 P3 F7 76.1(13) 2_645 . ? 
F8 P3 F7 87.8(13) . . ? 
F8 P3 F7 87.8(13) 2_645 2_645 ? 
F8 P3 F7 76.1(13) . 2_645 ? 
F7 P3 F7 111(2) . 2_645 ? 
F8 P3 F9 94.8(10) 2_645 2_645 ? 
F8 P3 F9 103.6(11) . 2_645 ? 
F7 P3 F9 168.1(12) . 2_645 ? 
F7 P3 F9 76.0(11) 2_645 2_645 ? 
F8 P3 F9 103.6(11) 2_645 . ? 
F8 P3 F9 94.8(10) . . ? 
F7 P3 F9 76.0(11) . . ? 
F7 P3 F9 168.1(12) 2_645 . ? 
F9 P3 F9 99.3(11) 2_645 . ? 
C18 N1 C1 112.7(10) . . ? 
C18 N1 C12 110.3(10) . . ? 
C1 N1 C12 118.8(11) . . ? 
C18 N1 Ru1 110.3(8) . . ? 
C1 N1 Ru1 97.0(7) . . ? 
C12 N1 Ru1 106.5(7) . . ? 
C6 N2 C2 118.0(11) . . ? 
C6 N2 Ru1 132.9(10) . . ? 
C2 N2 Ru1 109.1(9) . . ? 
C11 N3 C7 119.7(11) . . ? 
C11 N3 Ru1 132.3(8) . . ? 
C7 N3 Ru1 107.8(8) . . ? 
C17 N4 C13 122.6(10) . . ? 
C17 N4 Ru1 128.2(8) . . ? 
C13 N4 Ru1 108.9(8) . . ? 
C23 N5 C19 122.8(9) . . ? 
C23 N5 Ru1 125.7(7) . . ? 
C19 N5 Ru1 111.3(8) . . ? 
N7 N6 Ru1 138.8(9) . . ? 
N6 N7 N6 174.0(15) 2_655 . ? 
C2 C1 N1 111.7(11) . . ? 
C2 C1 C7 109.2(11) . . ? 
N1 C1 C7 103.0(12) . . ? 
C3 C2 C1 127.1(14) . . ? 
C3 C2 N2 122.7(14) . . ? 
C1 C2 N2 110.2(10) . . ? 
C2 C3 C4 114.9(15) . . ? 
C5 C4 C3 122.5(14) . . ? 
C4 C5 C6 121.8(14) . . ? 
N2 C6 C5 119.9(14) . . ? 
N3 C7 C8 116.2(12) . . ? 
N3 C7 C1 114.5(13) . . ? 
C8 C7 C1 129.3(14) . . ? 
C9 C8 C7 128.5(16) . . ? 
C8 C9 C10 111.0(16) . . ? 
C11 C10 C9 122.9(12) . . ? 
N3 C11 C10 119.8(11) . . ? 
C13 C12 N1 112.0(12) . . ? 
N4 C13 C12 120.4(10) . . ? 
N4 C13 C14 115.0(11) . . ? 
C12 C13 C14 124.4(11) . . ? 
C15 C14 C13 121.9(11) . . ? 
C16 C15 C14 120.7(12) . . ? 
C15 C16 C17 120.4(15) . . ? 
N4 C17 C16 119.3(12) . . ? 
C19 C18 N1 111.3(11) . . ? 
N5 C19 C18 120.6(10) . . ? 
N5 C19 C20 115.1(11) . . ? 
C18 C19 C20 124.2(10) . . ? 
C21 C20 C19 123.6(10) . . ? 
C20 C21 C22 122.9(10) . . ? 
C23 C22 C21 110.5(10) . . ? 
N5 C23 C22 125.0(10) . . ? 
 
loop_ 
 _geom_torsion_atom_site_label_1 
 _geom_torsion_atom_site_label_2 
 _geom_torsion_atom_site_label_3 
 _geom_torsion_atom_site_label_4 
 _geom_torsion 
 _geom_torsion_site_symmetry_1 
 _geom_torsion_site_symmetry_2 
 _geom_torsion_site_symmetry_3 
 _geom_torsion_site_symmetry_4 
 _geom_torsion_publ_flag 
N2 Ru1 N1 C18 -76.9(9) . . . . ? 
N4 Ru1 N1 C18 102.1(9) . . . . ? 
N5 Ru1 N1 C18 12.1(9) . . . . ? 
N3 Ru1 N1 C18 -165.0(9) . . . . ? 
N6 Ru1 N1 C18 -98(8) . . . . ? 
N2 Ru1 N1 C1 40.5(8) . . . . ? 
N4 Ru1 N1 C1 -140.5(8) . . . . ? 
N5 Ru1 N1 C1 129.5(8) . . . . ? 
N3 Ru1 N1 C1 -47.6(8) . . . . ? 
N6 Ru1 N1 C1 20(8) . . . . ? 
N2 Ru1 N1 C12 163.4(9) . . . . ? 
N4 Ru1 N1 C12 -17.6(8) . . . . ? 
N5 Ru1 N1 C12 -107.6(9) . . . . ? 
N3 Ru1 N1 C12 75.3(9) . . . . ? 
N6 Ru1 N1 C12 143(8) . . . . ? 
N1 Ru1 N2 C6 153.2(12) . . . . ? 
N4 Ru1 N2 C6 148.3(17) . . . . ? 
N5 Ru1 N2 C6 69.3(12) . . . . ? 
N3 Ru1 N2 C6 -124.9(12) . . . . ? 
N6 Ru1 N2 C6 -27.8(12) . . . . ? 
N1 Ru1 N2 C2 -22.8(7) . . . . ? 
N4 Ru1 N2 C2 -28(2) . . . . ? 
N5 Ru1 N2 C2 -106.7(7) . . . . ? 
N3 Ru1 N2 C2 59.1(7) . . . . ? 
N6 Ru1 N2 C2 156.2(7) . . . . ? 
N2 Ru1 N3 C11 128.5(11) . . . . ? 
N1 Ru1 N3 C11 -148.2(11) . . . . ? 
N4 Ru1 N3 C11 -63.8(11) . . . . ? 
N5 Ru1 N3 C11 -159.5(12) . . . . ? 
N6 Ru1 N3 C11 34.5(12) . . . . ? 
N2 Ru1 N3 C7 -57.4(10) . . . . ? 
N1 Ru1 N3 C7 25.9(10) . . . . ? 
N4 Ru1 N3 C7 110.3(10) . . . . ? 
N5 Ru1 N3 C7 15(2) . . . . ? 
N6 Ru1 N3 C7 -151.4(10) . . . . ? 
N2 Ru1 N4 C17 -165.0(16) . . . . ? 
N1 Ru1 N4 C17 -169.9(10) . . . . ? 
N5 Ru1 N4 C17 -86.1(9) . . . . ? 
N3 Ru1 N4 C17 108.7(9) . . . . ? 
N6 Ru1 N4 C17 11.1(10) . . . . ? 
N2 Ru1 N4 C13 9(2) . . . . ? 
N1 Ru1 N4 C13 4.5(7) . . . . ? 
N5 Ru1 N4 C13 88.2(7) . . . . ? 
N3 Ru1 N4 C13 -76.9(7) . . . . ? 
N6 Ru1 N4 C13 -174.5(7) . . . . ? 
N2 Ru1 N5 C23 -105.9(9) . . . . ? 
N1 Ru1 N5 C23 171.0(8) . . . . ? 
N4 Ru1 N5 C23 86.2(9) . . . . ? 
N3 Ru1 N5 C23 -177.8(13) . . . . ? 
N6 Ru1 N5 C23 -11.7(9) . . . . ? 
N2 Ru1 N5 C19 79.2(7) . . . . ? 
N1 Ru1 N5 C19 -3.9(7) . . . . ? 
N4 Ru1 N5 C19 -88.7(7) . . . . ? 
N3 Ru1 N5 C19 7.3(19) . . . . ? 
N6 Ru1 N5 C19 173.3(7) . . . . ? 
N2 Ru1 N6 N7 -89.4(15) . . . . ? 
N1 Ru1 N6 N7 -69(9) . . . . ? 
N4 Ru1 N6 N7 91.5(15) . . . . ? 
N5 Ru1 N6 N7 -178.1(14) . . . . ? 
N3 Ru1 N6 N7 -1.7(15) . . . . ? 
Ru1 N6 N7 N6 -160.8(14) . . . 2_655 ? 
C18 N1 C1 C2 58.1(13) . . . . ? 
C12 N1 C1 C2 -170.5(10) . . . . ? 
Ru1 N1 C1 C2 -57.3(9) . . . . ? 
C18 N1 C1 C7 175.2(11) . . . . ? 
C12 N1 C1 C7 -53.5(13) . . . . ? 
Ru1 N1 C1 C7 59.7(11) . . . . ? 
N1 C1 C2 C3 -135.3(11) . . . . ? 
C7 C1 C2 C3 111.4(14) . . . . ? 
N1 C1 C2 N2 43.1(12) . . . . ? 
C7 C1 C2 N2 -70.2(13) . . . . ? 
C6 N2 C2 C3 -2.9(16) . . . . ? 
Ru1 N2 C2 C3 173.7(9) . . . . ? 
C6 N2 C2 C1 178.6(10) . . . . ? 
Ru1 N2 C2 C1 -4.8(10) . . . . ? 
C1 C2 C3 C4 -179.0(11) . . . . ? 
N2 C2 C3 C4 2.8(17) . . . . ? 
C2 C3 C4 C5 -3(2) . . . . ? 
C3 C4 C5 C6 3(2) . . . . ? 
C2 N2 C6 C5 2.9(17) . . . . ? 
Ru1 N2 C6 C5 -172.8(10) . . . . ? 
C4 C5 C6 N2 -3(2) . . . . ? 
C11 N3 C7 C8 2(2) . . . . ? 
Ru1 N3 C7 C8 -172.6(13) . . . . ? 
C11 N3 C7 C1 179.5(13) . . . . ? 
Ru1 N3 C7 C1 4.5(17) . . . . ? 
C2 C1 C7 N3 73.7(17) . . . . ? 
N1 C1 C7 N3 -45.1(17) . . . . ? 
C2 C1 C7 C8 -110(2) . . . . ? 
N1 C1 C7 C8 131.6(19) . . . . ? 
N3 C7 C8 C9 -14(3) . . . . ? 
C1 C7 C8 C9 169(2) . . . . ? 
C7 C8 C9 C10 17(3) . . . . ? 
C8 C9 C10 C11 -9(3) . . . . ? 
C7 N3 C11 C10 4(2) . . . . ? 
Ru1 N3 C11 C10 177.3(11) . . . . ? 
C9 C10 C11 N3 0(2) . . . . ? 
C18 N1 C12 C13 -91.0(12) . . . . ? 
C1 N1 C12 C13 136.6(11) . . . . ? 
Ru1 N1 C12 C13 28.7(12) . . . . ? 
C17 N4 C13 C12 -172.7(11) . . . . ? 
Ru1 N4 C13 C12 12.6(13) . . . . ? 
C17 N4 C13 C14 3.8(15) . . . . ? 
Ru1 N4 C13 C14 -171.0(8) . . . . ? 
N1 C12 C13 N4 -28.7(16) . . . . ? 
N1 C12 C13 C14 155.2(10) . . . . ? 
N4 C13 C14 C15 -1.8(16) . . . . ? 
C12 C13 C14 C15 174.5(13) . . . . ? 
C13 C14 C15 C16 1(2) . . . . ? 
C14 C15 C16 C17 -2(2) . . . . ? 
C13 N4 C17 C16 -4.6(16) . . . . ? 
Ru1 N4 C17 C16 169.1(9) . . . . ? 
C15 C16 C17 N4 3(2) . . . . ? 
C1 N1 C18 C19 -125.3(12) . . . . ? 
C12 N1 C18 C19 99.3(13) . . . . ? 
Ru1 N1 C18 C19 -18.1(14) . . . . ? 
C23 N5 C19 C18 178.6(11) . . . . ? 
Ru1 N5 C19 C18 -6.3(13) . . . . ? 
C23 N5 C19 C20 2.1(14) . . . . ? 
Ru1 N5 C19 C20 177.2(7) . . . . ? 
N1 C18 C19 N5 16.5(16) . . . . ? 
N1 C18 C19 C20 -167.3(10) . . . . ? 
N5 C19 C20 C21 -1.4(15) . . . . ? 
C18 C19 C20 C21 -177.7(12) . . . . ? 
C19 C20 C21 C22 -1.3(18) . . . . ? 
C20 C21 C22 C23 3.0(16) . . . . ? 
C19 N5 C23 C22 -0.2(15) . . . . ? 
Ru1 N5 C23 C22 -174.6(7) . . . . ? 
C21 C22 C23 N5 -2.2(15) . . . . ? 
 
_diffrn_measured_fraction_theta_max    0.992 
_diffrn_reflns_theta_full              26.33 
_diffrn_measured_fraction_theta_full   0.992 
_refine_diff_density_max    2.110 
_refine_diff_density_min   -1.246 
_refine_diff_density_rms    0.145 

loop_
  _platon_squeeze_void_nr
  _platon_squeeze_void_average_x
  _platon_squeeze_void_average_y
  _platon_squeeze_void_average_z
  _platon_squeeze_void_volume
  _platon_squeeze_void_count_electrons
  _platon_squeeze_void_content
   1 -0.001  0.241  0.250      1054       310 ' '
   2  0.499  0.166  0.750      1054       310 ' '
